# Supplementary material for: Aberrant methylation and expression of TNXB promote chondrocyte apoptosis and extracullar matrix degradation in hemophilic arthropathy via AKT signaling
Source: eLife journal article supplement (doi:10.7554/elife.93087), 2024-02-19

**B)**

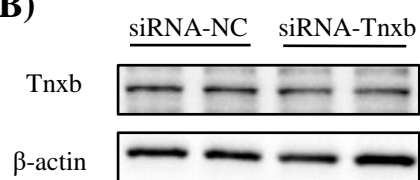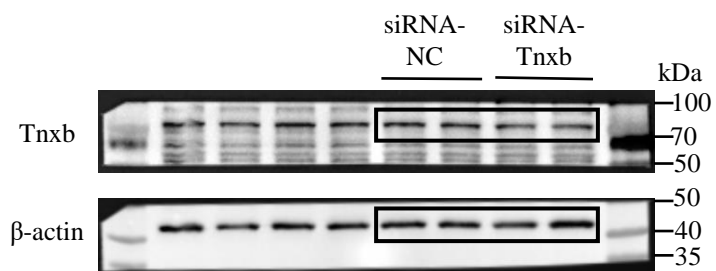

Supplement: fig4-data3 [file elife-93087-fig4-data3-v1.pdf]
