# Supplementary material for: Aberrant methylation and expression of TNXB promote chondrocyte apoptosis and extracullar matrix degradation in hemophilic arthropathy via AKT signaling
Source: eLife journal article supplement (doi:10.7554/elife.93087), 2024-02-19

A)

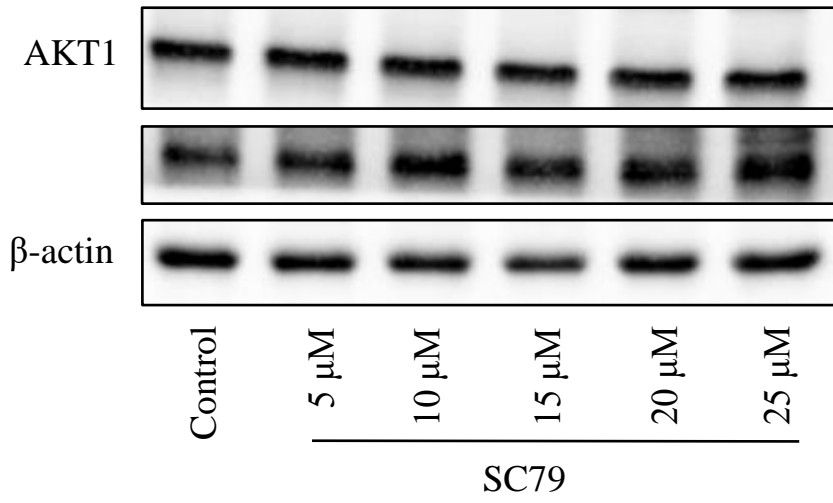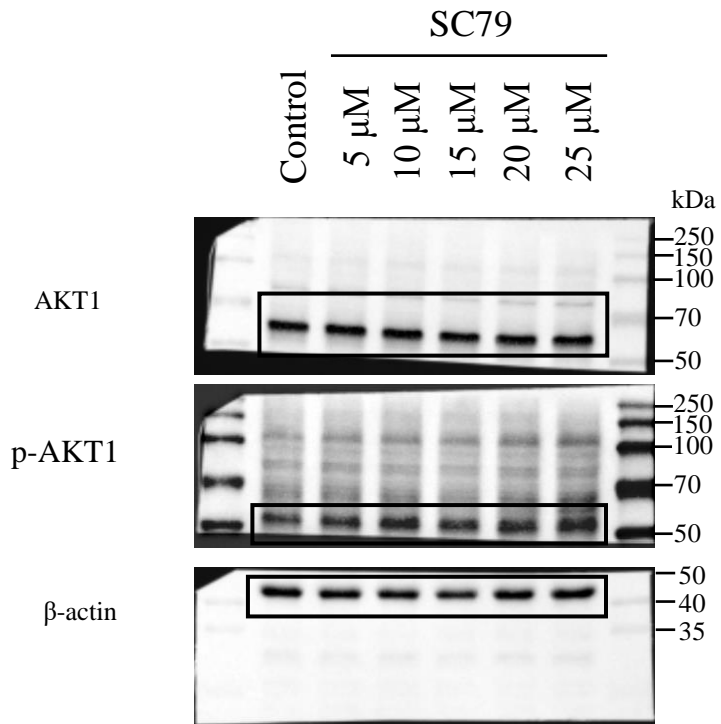

Supplement: fig6-figsupp1-data4 [file elife-93087-fig6-figsupp1-data4-v2.pdf]
